# Supplementary material
Source: PubMed Central journal article supplement (PMC4743257)
Supplement: NIHMS657782-supplement-01.pdf [file NIHMS657782-supplement-01.pdf]

# Supplementary Figure 1

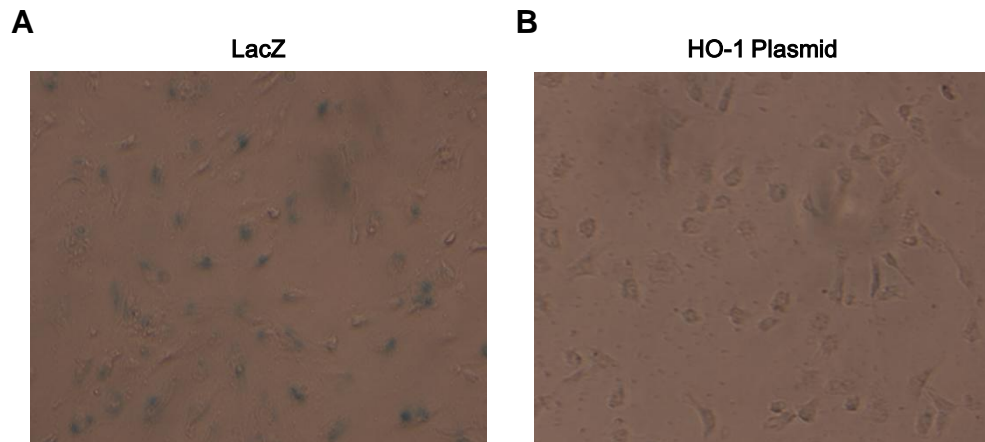

Transfection of HMEC cells with A) pcDNA 3.1D/V5-His/lacZ, plasmid expressing LacZ and B) pcDNA 3.1D/V5-HO-1 for 5 hr. Cells were stained with X-Gal staining solution and examined under the microscope. Notice that more than 50% of the all cells stained positively for LacZ (blue) in A.

## Supplementary Figure 2

**A**

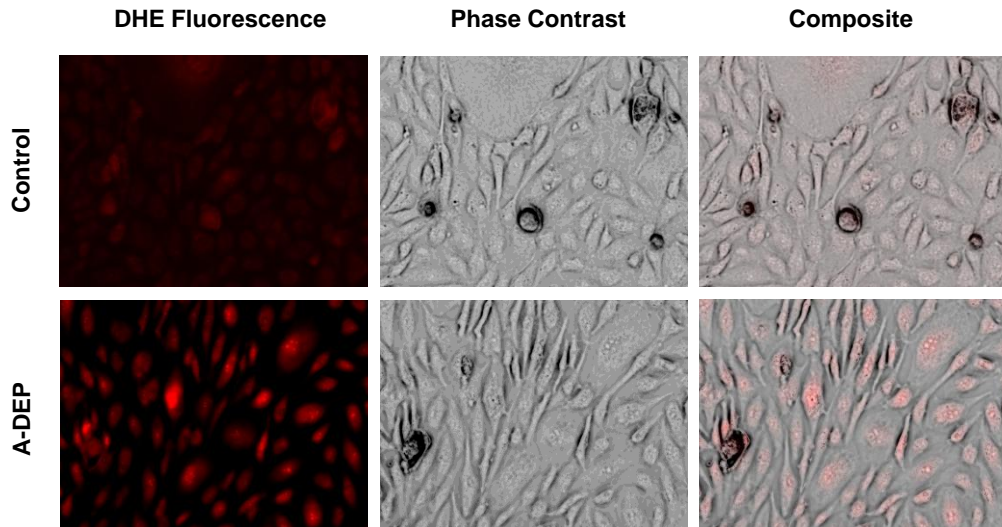

**B**

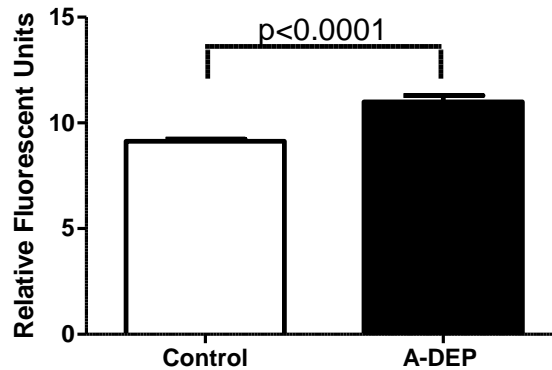

**DEP induces ROS generation in BAECs.** A) DEP and ROS generation. BAECs were treated with media alone (Top row) or A-DEP at 50  $\mu\text{g}/\text{ml}$  (bottom row) for 4 hours. Representative images for DHE fluorescence (left columns), phase contrast (middle columns) and Composite (right columns), obtained by overlay of fluorescence and light microscopy images, were taken out of mosaic pictures. B) Fluorescence was quantified from whole mosaic pictures as indicated in the Materials and Methods.

## Supplementary Table 1. Primers

| Genes          | Sequence                                                               |
|----------------|------------------------------------------------------------------------|
| $\beta$ -actin | Forward: CCAACCGCGAGAAGATGACC<br>Reverse: GATCTTCATGAGGTAGTCAGT        |
| HO-1           | Forward: GTGGAAACGGTTCACGTAGCGC<br>Reverse: CTTTCAGAAGGGCCAGGTGACC     |
| IL-8           | Forward: TGTCAGCACAACATGGTCTTG<br>Reverse: TGAGGTTTTGATTGTTTCATGTCTT   |
| ATF4           | Forward: TCTCCAGCGACAAGGCTAA<br>Reverse: CAATCTGTCCCGGAGAAGG           |
| ICAM           | Forward: CCTTCCTCACCGTGTACTGG<br>Reverse: AGCGTAGGGTAAGGTTCTTGC        |
| VCAM           | Forward: TGGACATAAGAACTGGAAAAGG<br>Reverse: CCACTCATCTCGATTTCTGGA      |
| MCP-1          | Forward: TGCTCATAGCAGCCACCTTCATTC<br>Reverse: GACACTTGCTGCTGGTGATTCTTC |
